# Supplementary material for: In situ fabrication of a graphene-coated three-dimensional nickel oxide anode for high-capacity lithium-ion batteries
Source: Royal Society of Chemistry journal article supplement (doi:10.1039/c7ra10987c), 2018-01-01
Supplement: c7ra10987c1.pdf [file c7ra10987c1.pdf]

## Supplementary Data

### **In-Situ Fabrication of Graphene Coated Three-Dimensional Nickel Oxide Anode for High Capacity Lithium-Ion Batteries**

**Chiwon Kang<sup>1,†</sup>, Eunho Cha<sup>1,†</sup>, Sang Hyub Lee<sup>2,3</sup>, Wonbong Choi<sup>1,4\*</sup>**

<sup>1</sup>\*Department of Materials Science and Engineering, <sup>4</sup>Department of Mechanical and Energy Engineering, University of North Texas, Discovery Park 3940 North Elm St., Denton, TX 76207, USA

<sup>2</sup>IBS Center for Integrated Nanostructure Physics, Institute for Basic Science, <sup>3</sup>Department of Energy Science, Department of Physics, Sungkyunkwan University, Suwon 16419, South Korea

<sup>†</sup>These two authors equally contributed.

\*E-mail: wonbong.choi@unt.edu

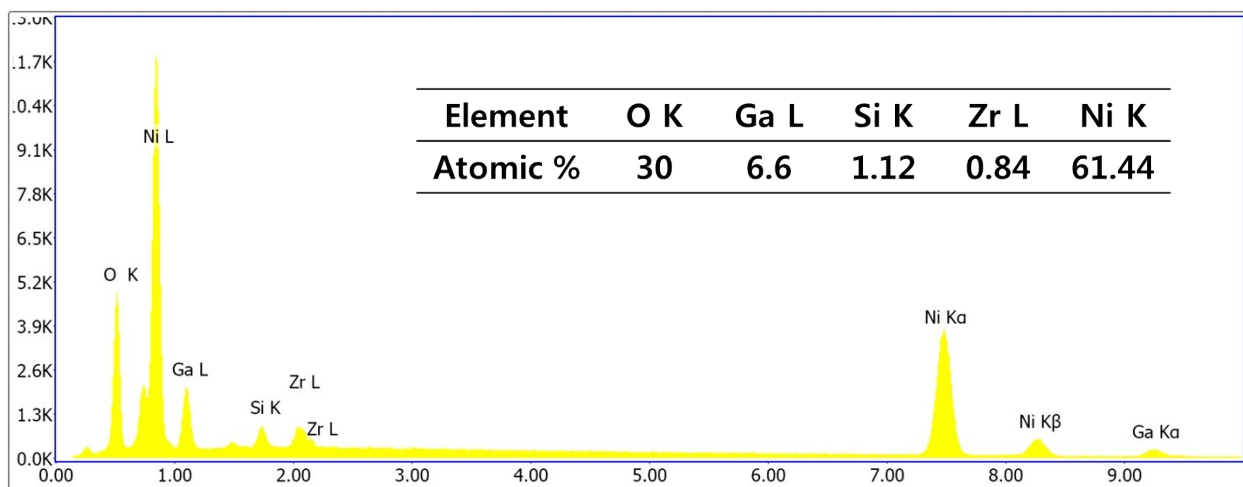

Figure S1. EDS spectra for the constituent elements of the 3D NiO-Ni. Note that the Ga peak is artifact from the FIB process.

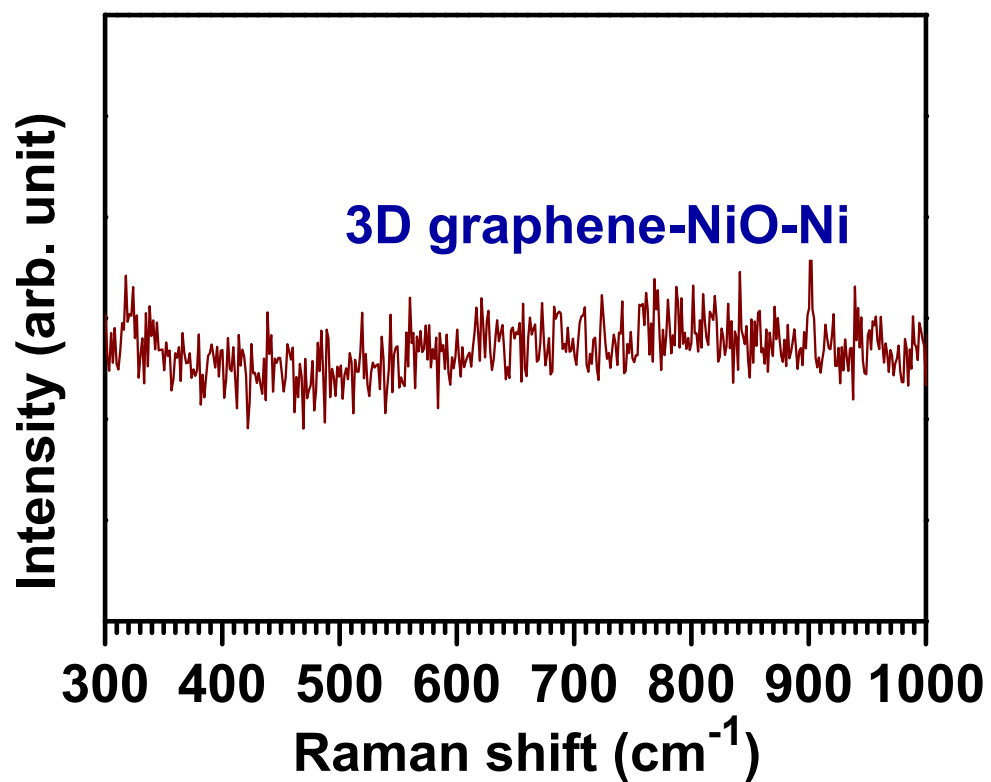

Figure S2. Raman spectra of the 3D graphene-NiO-Ni hybrid anode structure with wavenumber in the range of 300 to 1,000 cm<sup>-1</sup>.

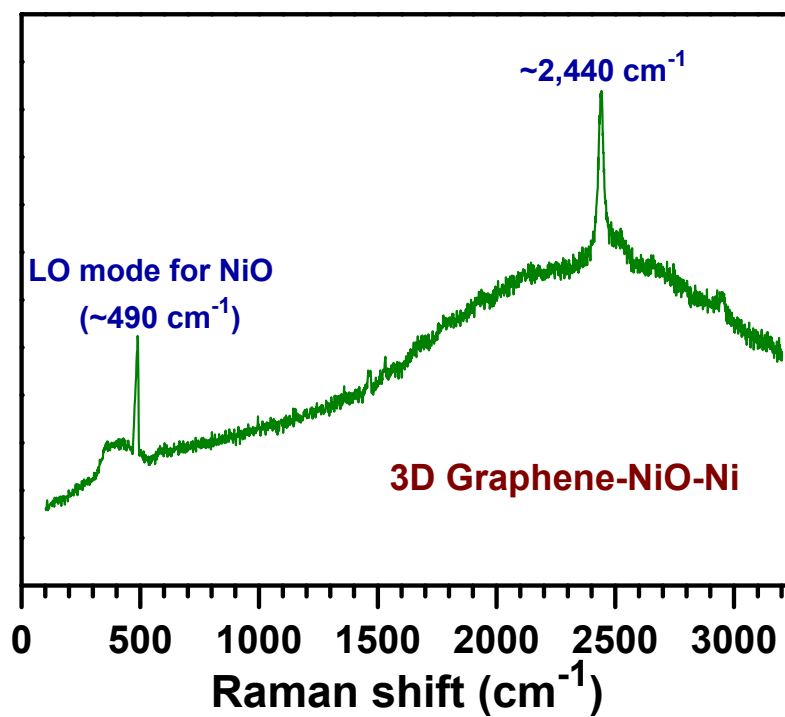

Figure S3. Raman data of the 3D graphene-NiO-Ni anode structure with wavenumber in the range of 100 to 3,200 cm<sup>-1</sup>. Note that the 2D band peak for graphene is shifted from 2,700 to ~2,440 cm<sup>-1</sup>, which is mainly due to the C-O bonding derived from 3D NiO-Ni substrate effect.

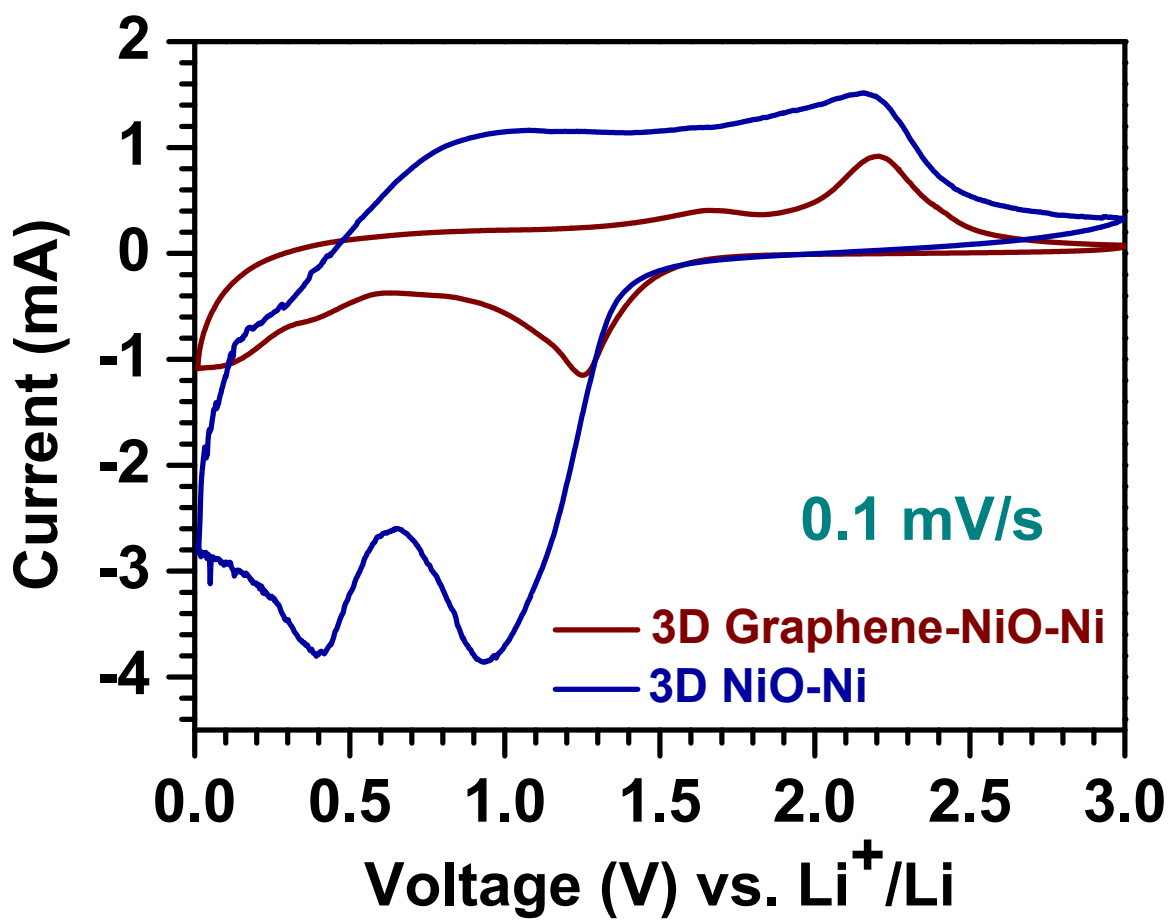

Figure S4. CVs of the 3D graphene-NiO-Ni and 3D NiO-Ni anode samples in the voltage range of 0.01 to 3V at a scan rate of  $0.1 \text{ mV s}^{-1}$  for the third cycle.
